# Supplementary material for: Cancer reversion with oocyte extracts is mediated by cell cycle arrest and induction of tumour dormancy
Source: PubMed Central journal article supplement (PMC5882314; doi:10.18632/oncotarget.24664), 2018-03-23
Supplement: oncotarget-09-16008-s001.pdf [file oncotarget-09-16008-s001.pdf]

# Cancer reversion with oocyte extracts is mediated by cell cycle arrest and induction of tumour dormancy

## SUPPLEMENTARY MATERIALS

**A**

| TOP NETWORKS<br>(Associated network functions)                                                      | Score | TOP BIO FUNCTIONS<br>(Molecular and Cellular functions) | P value           | Molecules |
|-----------------------------------------------------------------------------------------------------|-------|---------------------------------------------------------|-------------------|-----------|
| Developmental Disorder, Hereditary disorder, Metabolic disease                                      | 44    | Protein synthesis                                       | 1.17E-02-7.11E-11 | 197       |
| Post-translational modification, Protein folding, Cellular assembly and organisation                | 44    | RNA post-transcriptional modification                   | 9.30E-03-2.05E-10 | 87        |
| Hereditary disorder, Metabolic disease, Lipid metabolism                                            | 44    | Gene expression                                         | 1.49E-02-5.53E-10 | 315       |
| DNA replication, recombination and repair, Hereditary disorder, Neurological disorder               | 41    | Cellular growth and proliferation                       | 1.49E-02-7.39E-09 | 483       |
| Cell death and survival, cellular growth and proliferation, Cell-to-cell signalling and interaction | 41    | Cell death and survival                                 | 1.49E-02-7.50E-09 | 483       |

**B**

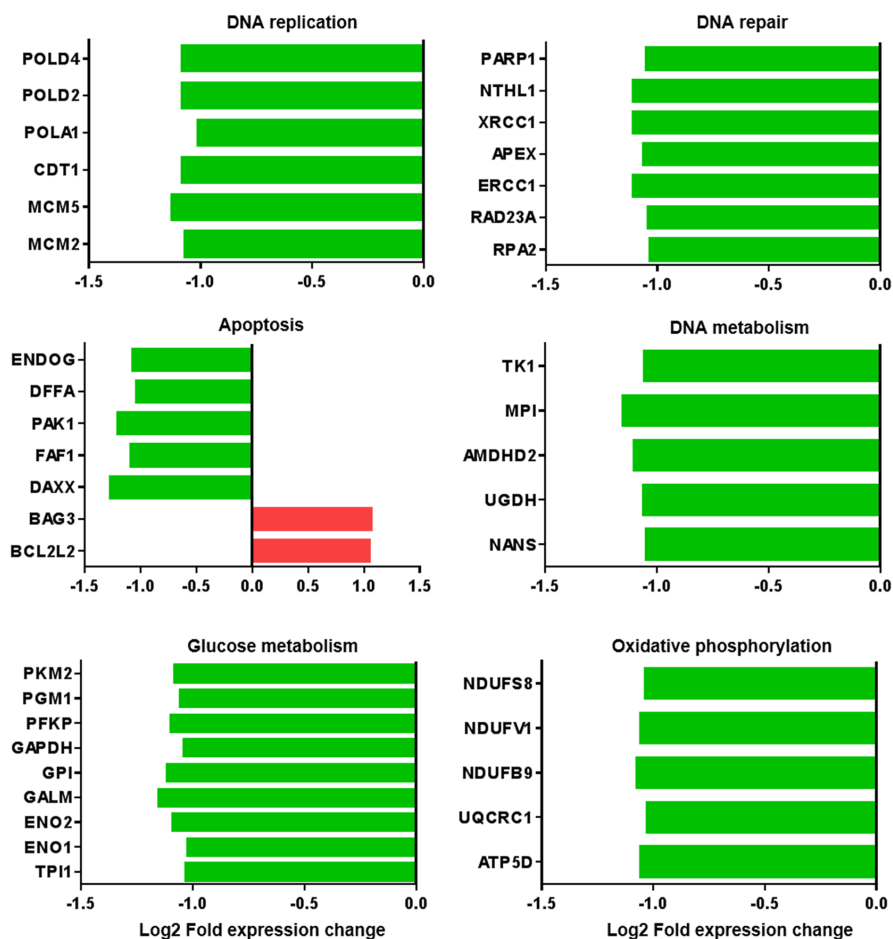

**Supplementary Figure 1: Gene expression profile of AOE-treated tumour xenografts. (A)** Top five Networks and Bio Functions identified by IPA. **(B)** Fold change in expression of genes involved in DNA replication, DNA metabolism, glucose metabolism and oxidative phosphorylation as determined by microarray analysis.

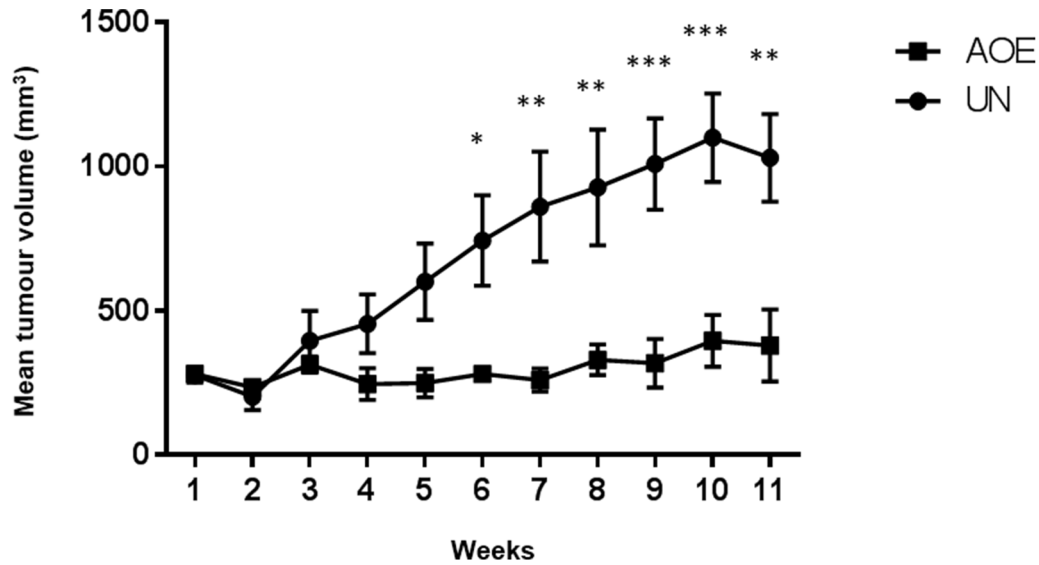

**Supplementary Figure 2: Growth of AOE-treated tumour xenografts.** Growth curve of tumour xenografts. MCF-7 cells (untreated and AOE-treated,  $1.5 \times 10^6$ ) were injected sub-cutaneously with Matrigel into the left flank of female MF1 nude mice receiving 17-beta-estradiol pellets (n=6). Tumour dimensions were monitored twice weekly by calliper measurements. For BrdU incorporation experiments, BrdU (10 mg/ml) was injected at a dose of 150mg/kg via intraperitoneal injection 60 minutes before sacrifice. At termination (11 weeks), tumours were excised and analysed. Data were analysed by Two-way Anova followed by Bonferroni's multiple comparisons test. \*p<0.05, \*\*p<0.01, \*\*\*p<0.001.

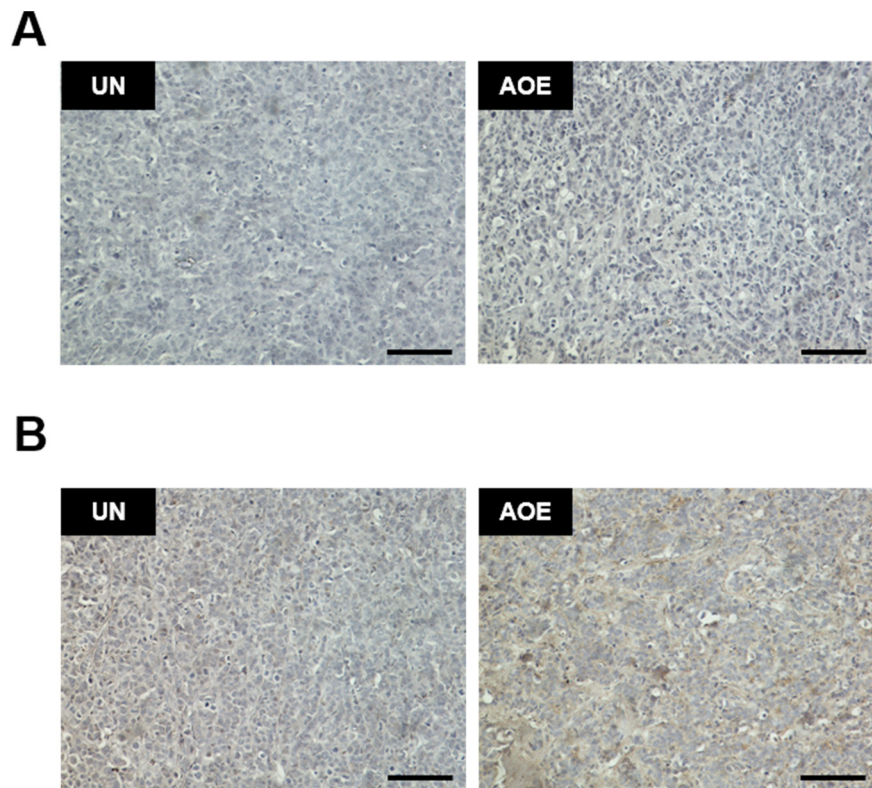

**Supplementary Figure 3: Levels of phospho-RB (Ser795) and p38MAPK in AOE-reprogrammed tumours.** (A) Phospho-RB (Ser795) staining of UN and AOE-treated tumour xenografts. Scale bar = 100µm. (B) p38MAPK staining of UN and AOE-treated tumour xenografts. Scale bar = 100µm.

**Supplementary Table 1: Most significant canonical pathways.**

**See Supplementary File 1**

**Supplementary Table 2: PCR assays and antibodies used in this study.**

**See Supplementary File 2**
